# Supplementary material for: Integrative network analysis reveals molecular mechanisms of blood pressure regulation
Source: PubMed Central journal article supplement (PMC4422556; doi:10.15252/msb.20145399), 2015-04-16

**Supplementary Fig S1: The distribution of SBP and DBP in the 3679 FHS participants who were not receiving anti-hypertensive treatment. A) Histogram of SBP; B) Histogram of DBP.**

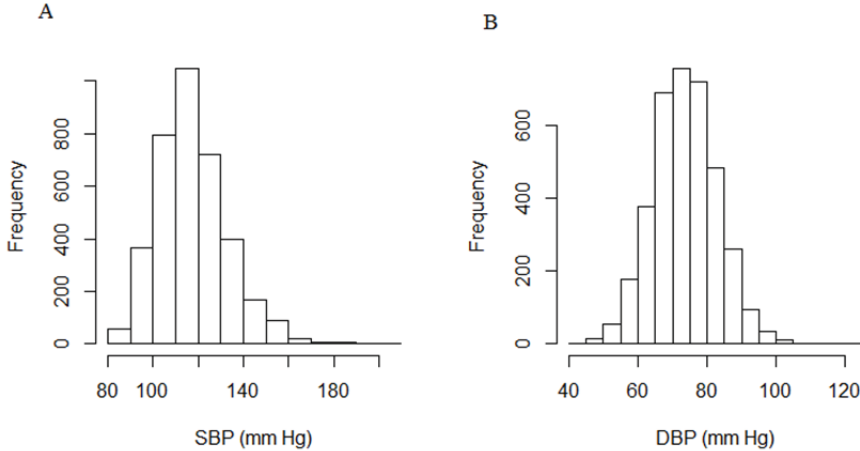

Supplement: MSB-11-799-s001.pdf [file MSB-11-799-s001.pdf]
