# Supplementary material for: Integrative network analysis reveals molecular mechanisms of blood pressure regulation
Source: PubMed Central journal article supplement (PMC4422556; doi:10.15252/msb.20145399), 2015-04-16

**Supplementary Fig S2: Dynamic tree-cut plots of the coexpression networks using gene expression data adjusted and unadjusted for cell counts, respectively.** A) network from cell count adjusted analysis; B) network from cell count unadjusted analysis. The gene clustering tree (dendrogram) was obtained from an average linkage hierarchical clustering of adjacency-based dissimilarity metric. The dynamic tree-cut algorithm was then used to choose the cut-off for module identification. The modules are highlighted as color blocks. The height of the tree (dendrogram) indicates the dissimilarity score among genes.

A

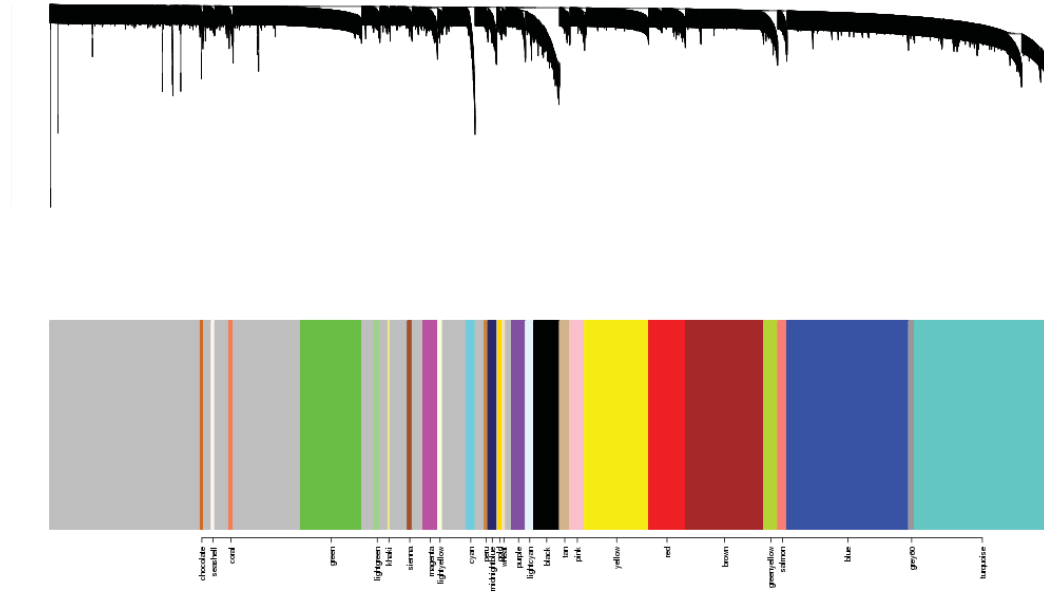

B

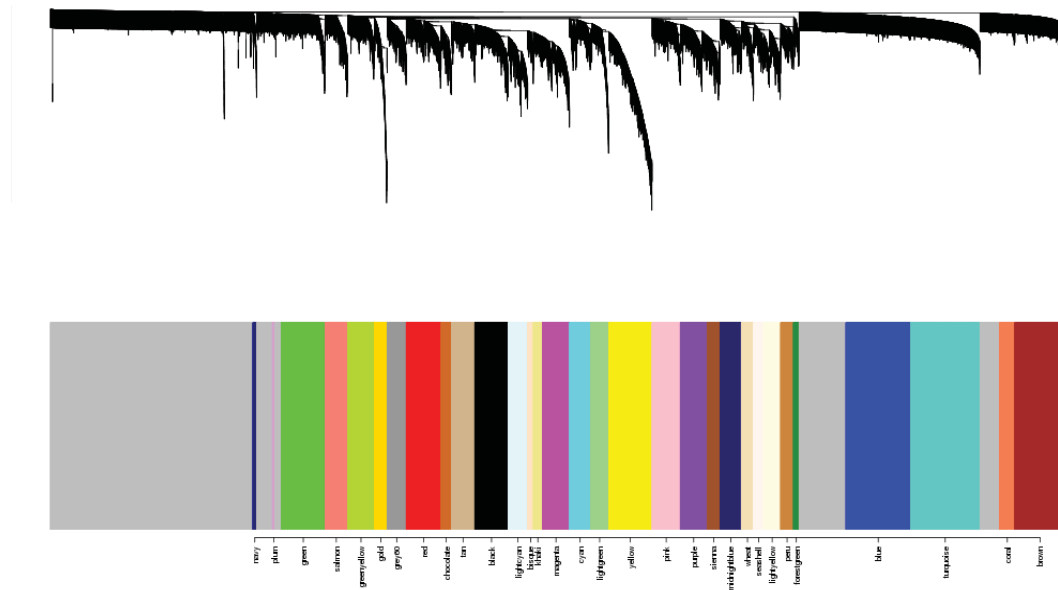

Supplement: MSB-11-799-s002.pdf [file MSB-11-799-s002.pdf]
