# Supplementary material for: Integrative network analysis reveals molecular mechanisms of blood pressure regulation
Source: PubMed Central journal article supplement (PMC4422556; doi:10.15252/msb.20145399), 2015-04-16

C

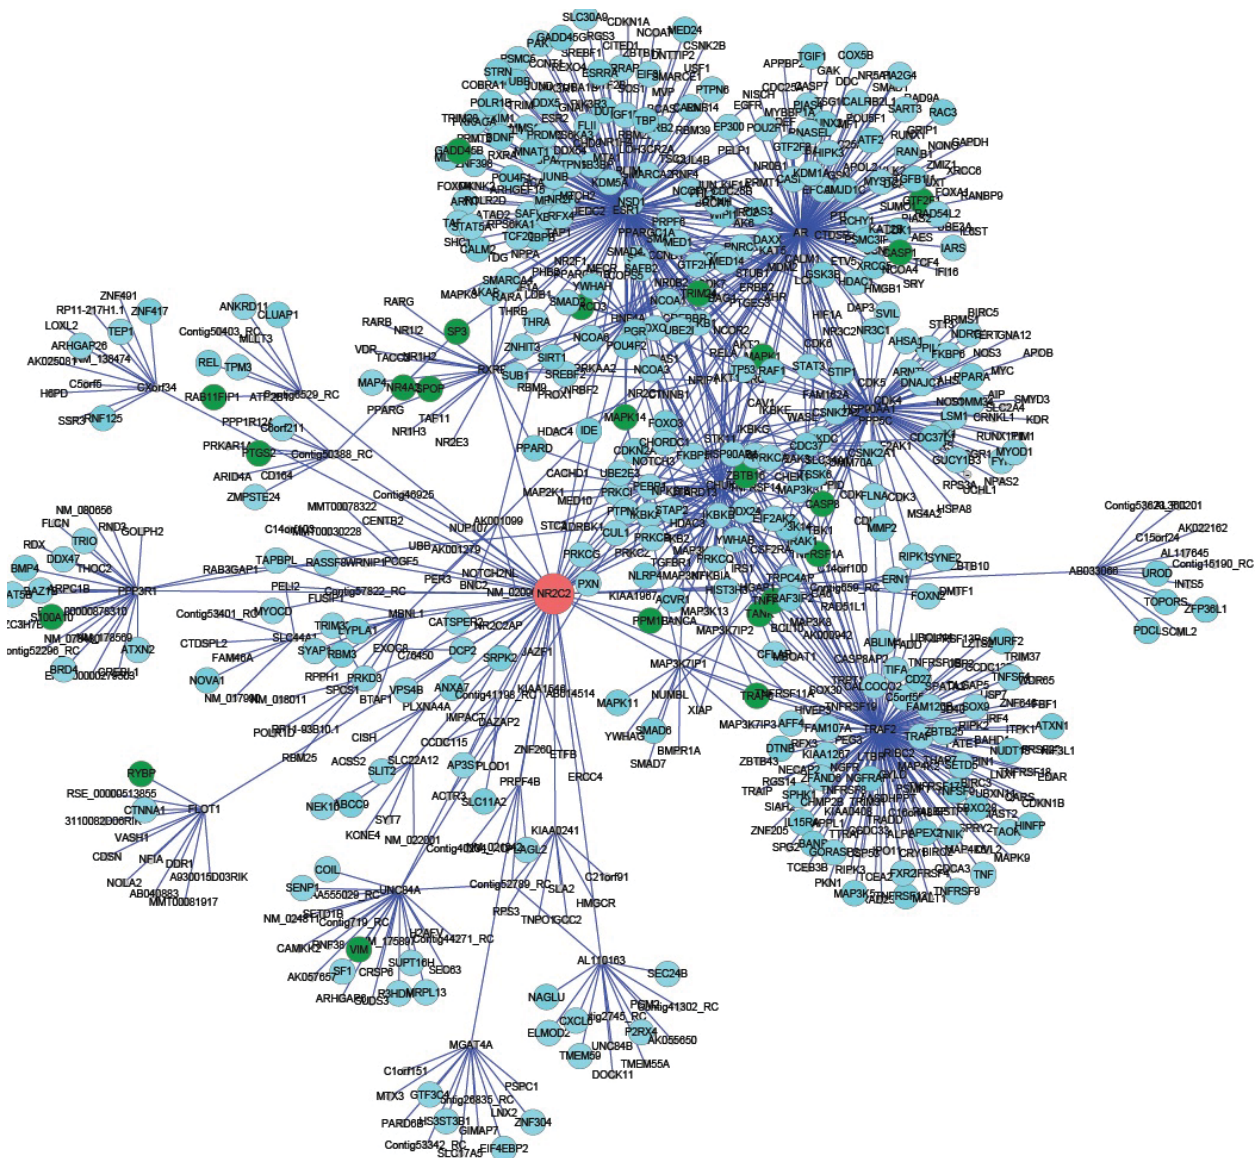

Supplement: MSB-11-799-s003.pdf [file MSB-11-799-s003.pdf]
