# Supplementary material for: Integrative network analysis reveals molecular mechanisms of blood pressure regulation
Source: PubMed Central journal article supplement (PMC4422556; doi:10.15252/msb.20145399), 2015-04-16

**Supplementary Figure S3. Co-expression modules and their correlation with BP.** A) The correlation of eigengenes of each BP coexpression module (coEM) with SBP; B) The correlation of eigengenes of each BP coEM with DBP; C) The enrichment of BP top signature genes in each BP coEM. The y-axis is the  $-\log_{10}$  transformed p value.

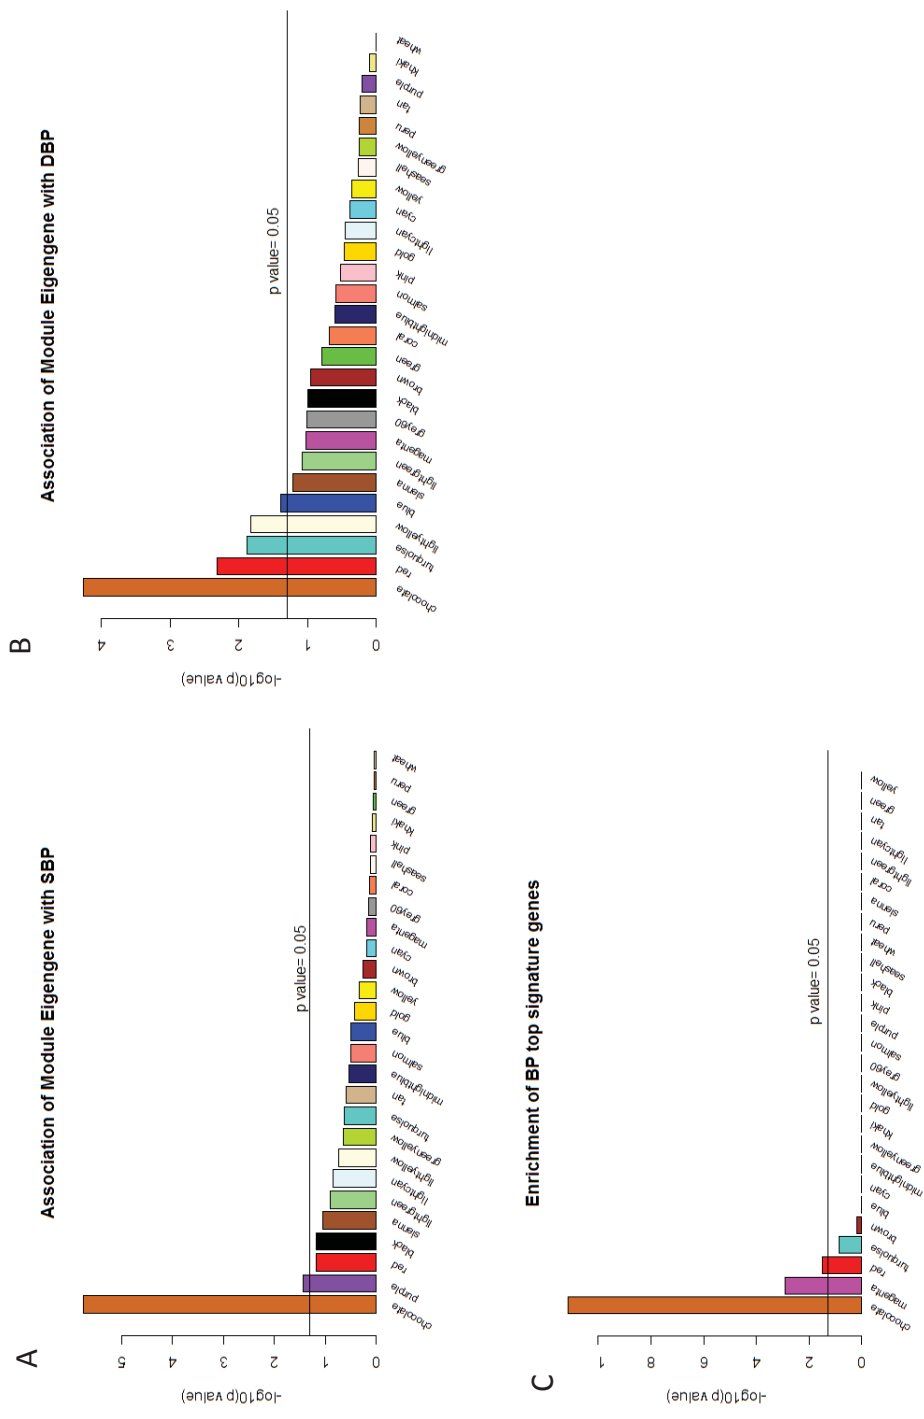

Supplement: MSB-11-799-s013.pdf [file MSB-11-799-s013.pdf]
