# Supplementary material for: Integrative network analysis reveals molecular mechanisms of blood pressure regulation
Source: PubMed Central journal article supplement (PMC4422556; doi:10.15252/msb.20145399), 2015-04-16

**Supplementary Fig S4: Coexpression module comparison between the cell count adjusted and unadjusted analyses.** Modules from the adjusted analysis are listed along the Y axis and modules from unadjusted analysis are along the X axis. The numbers of genes in each module are listed after the module name. The number in each cell of the matrix indicates the number of genes that overlap between the two modules at the intersection. Color strength indicated the  $-\log_{10}$  transformed overlap p values assessed by Fisher's exact test.

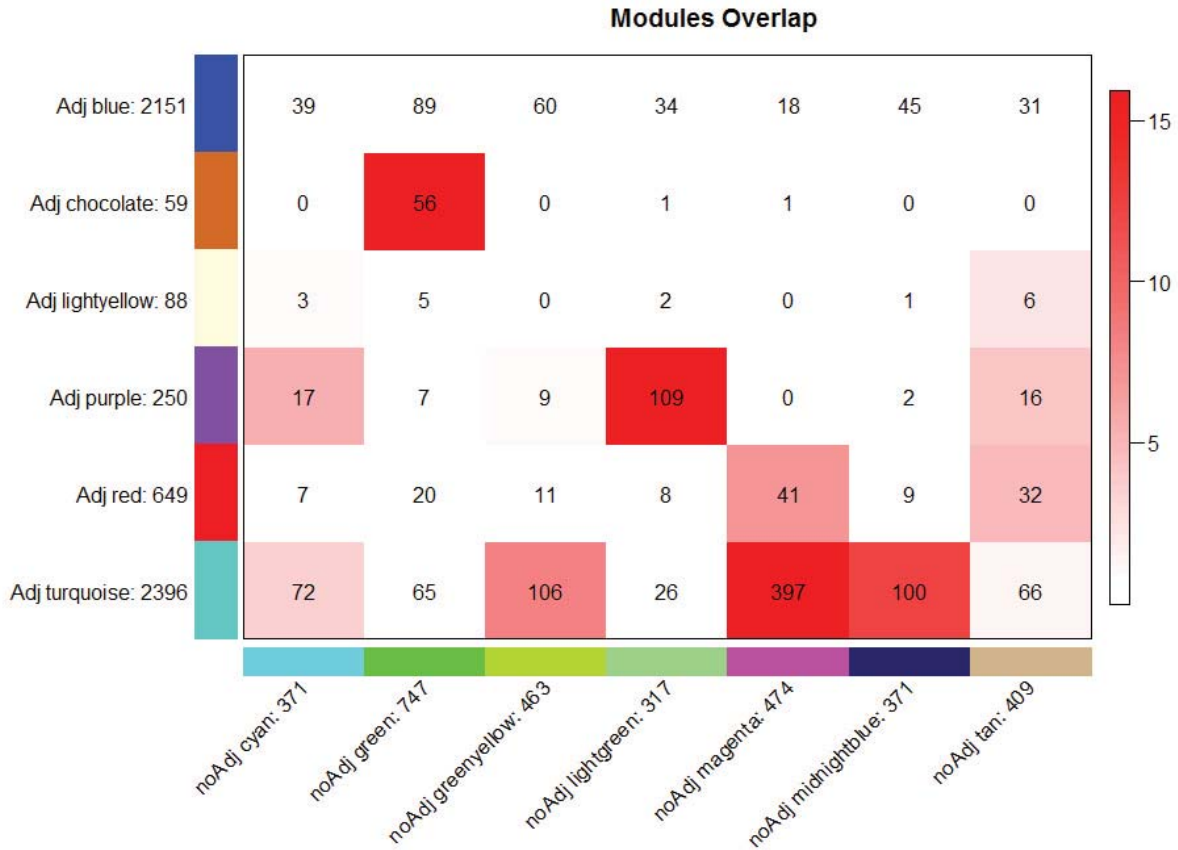

Supplement: MSB-11-799-s014.pdf [file MSB-11-799-s014.pdf]
