# Supplementary material for: Integrative network analysis reveals molecular mechanisms of blood pressure regulation
Source: PubMed Central journal article supplement (PMC4422556; doi:10.15252/msb.20145399), 2015-04-16

**Supplementary Fig S7: A Schematic Figure of the Key Driver Analysis (KDA).** In order to test if gene  $G$  (shown in red) is a KD or not, the subnetwork of  $G$  is first extracted by retrieving its 1<sup>st</sup> to 3<sup>rd</sup>-layer neighbor genes in the network. Subsequently, the enrichment of genes in a given BP gene set (shown in blue) in the subnetwork of  $G$  is evaluated.  $G$  is defined as a KD if the subnetwork of  $G$  is significantly enriched for genes in the tested gene set (evaluated by Fisher's Exact test; the significant threshold was Bonferroni-corrected for the number of genes in the gene network used).

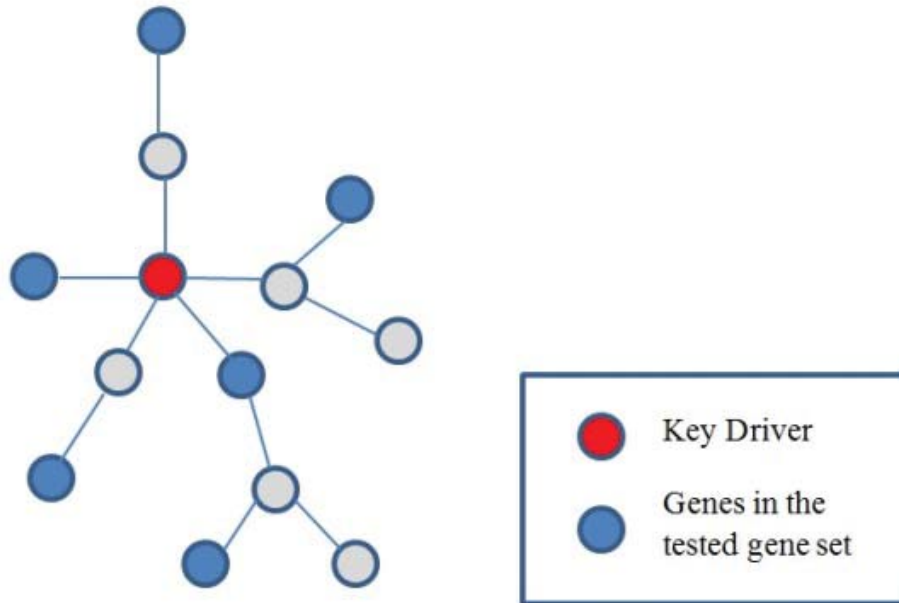

Supplement: MSB-11-799-s015.pdf [file MSB-11-799-s015.pdf]
